# Supplementary material for: Molybdenum η2-imine complex formation and the reductive coupling of imines
Source: Royal Society of Chemistry journal article supplement (doi:10.1039/b000355g), 2000-01-01
Supplement: b000355g.doc [file b000355g.doc]

Supplementary Information:

All NMR were run at 300 MHz unless otherwise indicated.

Spectroscopic data for **1**: NMR data in [2H6]benzene: 1H,  7.41 (m, 4H, diamide *ortho*-protons and phenylimido *ortho*-protons), 7.07 (t, phenylimido *meta*-protons), 7.00 (m, diamide ring *meta*-protons), 6.88 (t, phenylimido *para*-proton), 2.99 (d, 1H, CH2C(CH3)2), 2.60 (s, 3H, CH2C(CH3)2), 0.73 (ov, 4H, CH2C(CH3)2), 0.36 ((CH3)3Si), 0.29 ((CH3)3Si); 13C,  157.9, 132.8, 131.9, 129.1, 125.0, 124.7, 124.4, 124.0, 123.6, 123.1, 81.0, 59.1, 33.5, 27.6, 26.0, 1.7, 1.1.

Spectroscopic data for **2a** and **2b**: NMR data in [2H6]benzene: **2a**: 1H (R.T.),  7.4-6.1 (ov m br, Ph, 18H), 4.79 (br, CH), 3.33 (OCH3), 0.42 ((CH3)3Si), 0.31 ((CH3)3Si); 13C:  157.5, 153.4, 138.4, 133.0, 129.1, 128.8, 126.6, 125.7, 125.5, 125.1, 124.9, 124.5, 124.0, 120.9, 119.3, 113.7 (ov),62.2 (br, imine C(H)), 55.0 (OCH3), 1.9 (ov, (CH3)3Si), one aromatic resonance obscured by solvent; MS calcd for [M]: 650.1796 *m/e*. Found (LSIMS): 650.1737 *m/e*. I.R.: 1589 cm-1. **2b**: 1H (R.T.),  7.4-6.4 (ov m br, Ph, 19H), 2.34 (br, CH3), 0.41 ((CH3)3Si), 0.34 ((CH3)3Si); 13C:  158.1, 151.3, 148.7, 134.5, 134.1, 129.6, 129.3, 127.9, 126.8, 126.2, 125.8, 125.4, 125.3, 124.9, 124.1, 123.5, 121.0, 119.6, 66.6 (br, imine C), 23.3 (CH3), 2.6 ((CH3)3Si ), 2.5 ((CH3)3Si); MS calcd for [M + H]+: 635.1925 *m/e*. Found (LSIMS): 635.1854 *m/e*. I.R.: 1580 cm-1. V.T. NMR data in [2H6] toluene: **2a**: 1H (-90oC),  7.5-6.4 (ov m, Ph, 16H), 6.1 (d br, *J* 7 Hz, ortho H), 5.0 (d br, *J* 7 Hz, ortho H), 4.77 (CH), 3.26(OCH3), 0.49 ((CH3)3Si), 0.33 ((CH3)3Si); **2b**: 1H (-650C),  7.4-6.2 (ov m, Ph, 15H), 6.61 (t, *J* 8 Hz, para H), 6.35 (d, *J* 8 Hz, ortho H), 6.27 (t, *J* 8 Hz, para H), 5.18 (d br, *J* 8 Hz, ortho H), 2.55 (CH3), 0.41 ((CH3)3Si), 0.31 ((CH3)3Si).

Spectroscopic data for **3a** and **3b**: NMR data in [2H6] benzene: **3a**: 1H(500MHz),  7.6-6.8 (ov m, Ph, 27H), 5.51 (d, *J* 15 Hz, benzylic proton), 5.45 (d, *J* 15 Hz, benzylic proton), 4.75 (NC(H)), 4.64 (d, *J* 15 Hz, benzylic proton), 4.51 (d, *J* 15Hz, benzylic proton), 4.50 (NC(H)), 3.36 (OCH3), 3.35 (OCH3),0.39 ((CH3)3Si), 0.26 ((CH3)3Si); selected 13C from hmqc: 81.6 (NC(H)), 80.2 (NC(H)), 66.8 (benzylic carbon), 66.6 (benzylic carbon), 54.6 (overlapping OCH3), 2.5 ((CH3)3Si), 2.1 ((CH3)3Si); MS calcd for [M + H]+: 890.3184 *m/e*. Found (LSIMS): 890.3157 *m/e*; **3b**:1H,  7.6-6.8 (ov m, Ph, 17H), 4.88 (NC(H)), 4.65(NC(H)), 4.19 (d of q, *J* 13 Hz, *J* 7 Hz, methylene CH), 4.01 (d of q, *J* 13 Hz, *J* 7 Hz, methylene CH), 3.81 (d of q, *J* 13 Hz, *J* 7 Hz, methylene CH), 3.38 (OCH3), 3.36 (OCH3), 3.26 (d of q, *J* 13 Hz, *J* 7 Hz, methylene CH), 0.89 (t, *J* 7 Hz, CH3), 0.62 (t, *J* 7 Hz, CH3), 0.38 ((CH3)3Si), 0.28 ((CH3)3Si); 13C: 159.7, 159.5, 156.9, 146.3, 146.2, 138.8, 138.1, 129.4, 129.1, 128.9, 127.2, 126.7, 124.5, 123.3, 123.2, 121.6, 114.3, 114.2, 85.7 (NCH2), 83.4 (NCH2), 59.4 (NC(H)), 58.2 (NC(H)), 55.4 (OCH3), 55.3 (OCH3), 17.3 (CH3), 15.8 (CH3), 3.5 ((CH3)3Si), 2.5 ((CH3)3Si); MS Calcd for [M + H]+: 766.2878 *m/e*. Found (LSIMS): 766.2818 *m/e*.
